# Supplementary material
Source: PubMed Central journal article supplement (PMC5341382)
Supplement: NIHMS847432-supplement-01.pdf [file NIHMS847432-supplement-01.pdf]

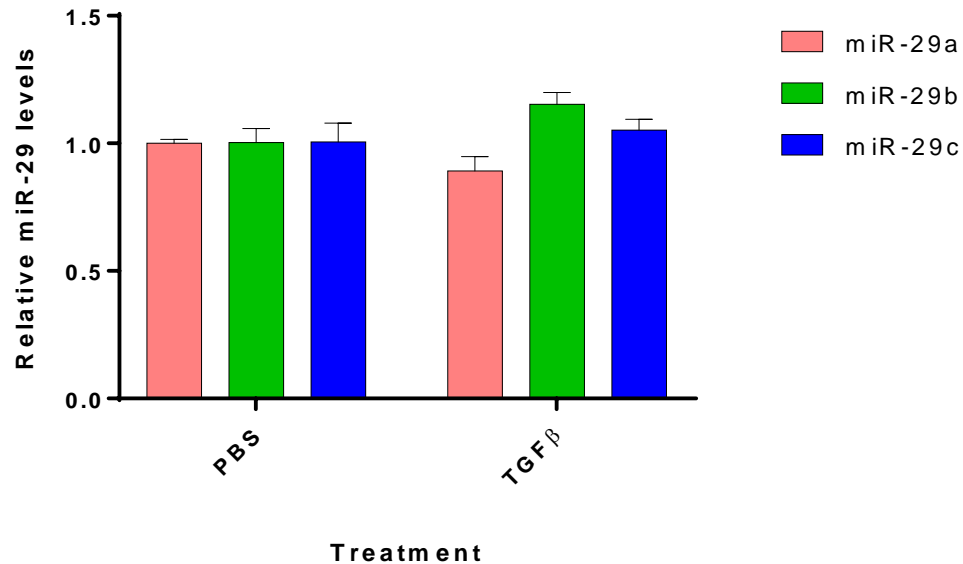

Supplementary Figure S1: miR-29 expression following TGF-β injection in wild-type mice. Mice were injected subcutaneously with 800 ng of recombinant TGF-β1 daily for 3 consecutive days. 24 h following the last injection, skin samples were taken from the injection site and assayed for miR-29 expression. Quantitative RT-PCR analysis of miR-29 levels relative to U6 levels. N = 3. Values represent mean ± SE. RT-PCR, reverse transcriptase PCR; SE, standard error.
